SPRING 2024 | VOLUME 36 | NUMBER 2

The Journal of  
**Neuropsychiatry**  
and Clinical Neurosciences

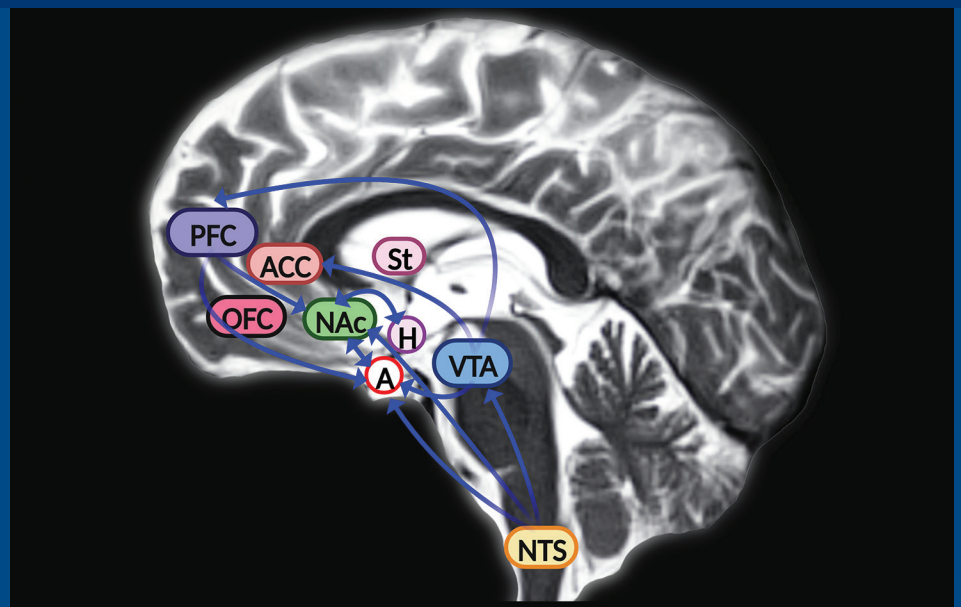

Glucagon-Like Peptide 1: An Introduction and Possible  
Implications for Neuropsychiatry

Telemedicine-Based Cognitive Examinations  
During COVID-19 and Beyond

Depression as a Risk Factor for Dementia: A Meta-Analysis

Symptom Attribution and Neuropsychological Outcomes  
Among Treatment-Seeking Veterans With a History  
of Traumatic Brain Injury

Resting-State Functional Connectivity of the  
Anterior Cingulate Cortex Among Persons With  
Mood Disorders and Suicidal Behaviors

Official Journal of the American Neuropsychiatric Association  
[neuro.psychiatryonline.org](http://neuro.psychiatryonline.org)
